# Supplementary material
Source: Springer Nature journal article supplement (https://www.springermedizin.de/resource/supplementary/12889_2012_4932_MOESM3_ESM.pdf/9490602)

■ Agenda-setting ■ Policy drafting ■ Policy implementation

N=482 references to stakeholders in newspaper notes

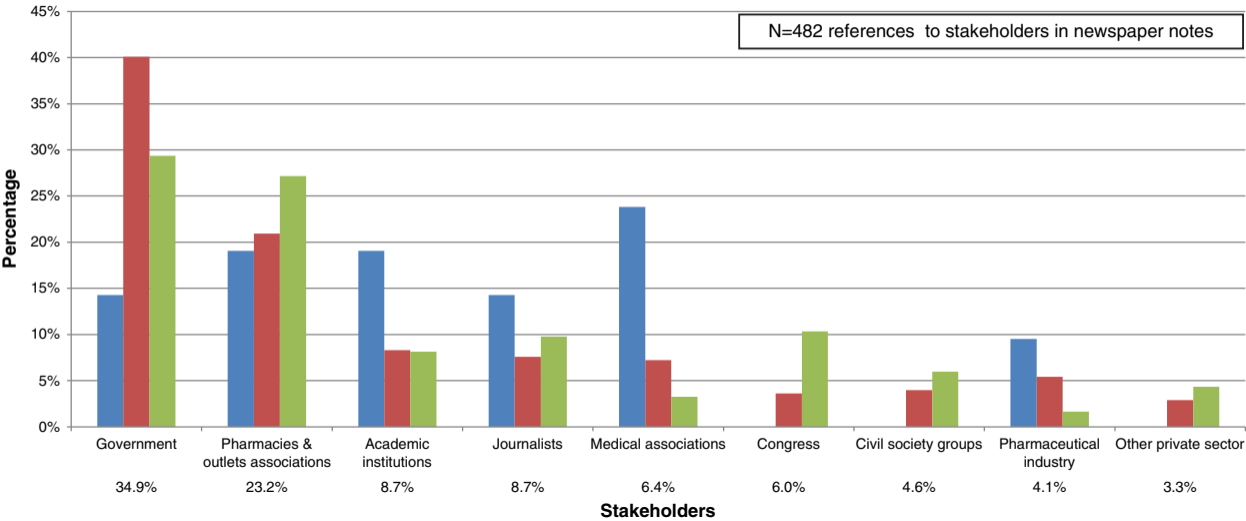

Supplement: MOESM3 [file 9490602]
